# Supplementary material for: Role of Paired Box 5 (PAX 5) Genetic Variant in the Development and Progression of Leukemia.
Source: Research Square preprint supplement (doi:10.21203/rs.3.rs-171897/v1), 2021-02-04
Supplement: Supplementary file 1 [file 69ab10ec0c75bb65732780c7.pdf]

## **Role of paired box 5 (*PAX 5*) genetic variant in the development and progression of leukemia.**

Amrita Bhat<sup>1</sup>, Monika Pandita<sup>2</sup>, Supriya Hakeem<sup>3</sup>, Gh. Rasool Bhat<sup>1</sup>, Sonali Verma<sup>4</sup>, Gresh Chander<sup>4</sup>, Shabab Angurana<sup>5</sup>, Asif Amin<sup>6</sup>, Raies Ahmed Qadri<sup>6</sup>, Ruchi Shah<sup>6#</sup>, Rakesh Kumar<sup>1#</sup>.

Contributing Authors Affiliations:

<sup>1</sup> Cancer Genetics Research Group, School of Biotechnology, Shri Mata Vaishno Devi University, Katra, J&K, India, 182320.

<sup>2</sup> Genomic Stability Lab, School of Biotechnology, Shri Mata Vaishno Devi University, Katra, J&K, India, 182320.

<sup>3</sup> Bioinformatics Infrastructure Facility, School of Biotechnology, Shri Mata Vaishno Devi University (SMVDU), Kakryal, Katra,<sup>2</sup>

<sup>4</sup> ICMR-CAR, Shri Mata Vaishno Devi University, Katra, J&K, India, 182320.

<sup>5</sup> Department of Radiotherapy, GMC, Jammu <sup>5</sup>

<sup>6</sup> ICMR-CAR, Department of Biotechnology, University of Kashmir.

# Corresponding Authors:

1) Dr. Rakesh Kumar

Assistant Professor

School of Biotechnology

Shri Mata Vaishno Devi University, Katra J&K, India

Mobile: +91-9419279629, Phone- 01991-285695; Ext. 2288

Email: [kumar.rakesh@smvdu.ac.in](mailto:kumar.rakesh@smvdu.ac.in)

2) Dr. Ruchi Shah,

Scientist B- ICMR-CAR

University of Kashmir,

J&K, India

[Scholarruchi@gmail.com](mailto:Scholarruchi@gmail.com)

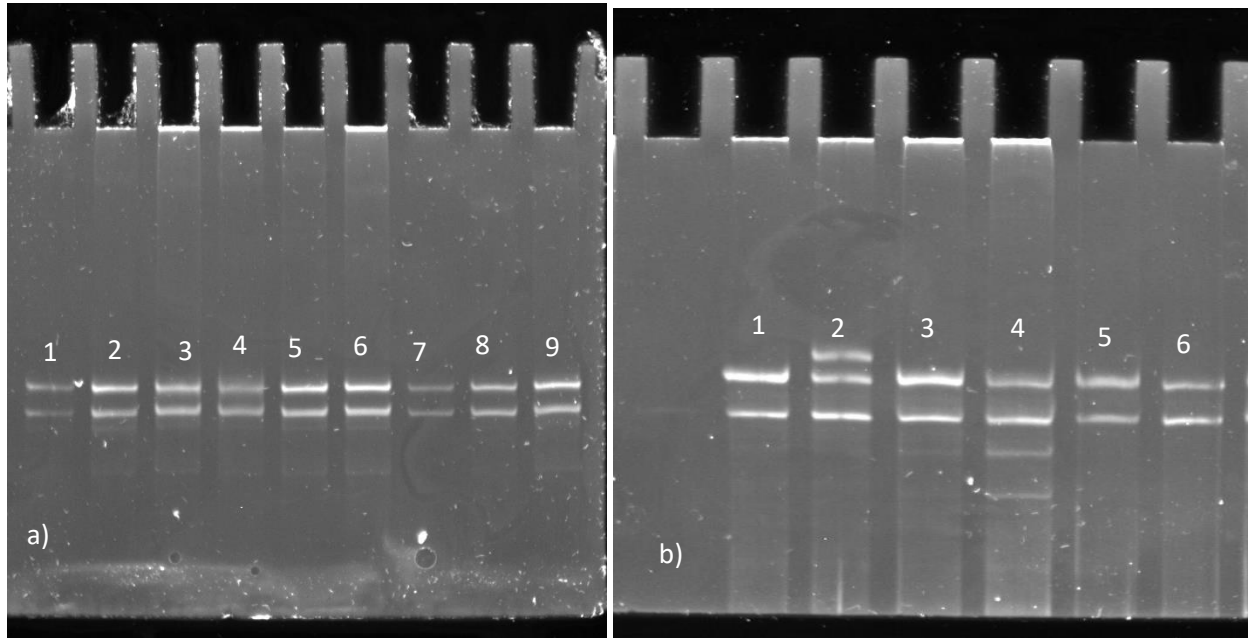

**Supplementary figure 2: Sample screening using Single Strand Conformational Polymorphism: (a) wild type (b) lane 1, lane 3 lane 5 and 6 shows wild type (2 bands) while as lane 2 shows heterozygosity (3 bands) and lane 4 shows homozygous mutant (4 bands).**
